# Supplementary material for: Urbanization and Unfavorable Changes in Metabolic Profiles: A Prospective Cohort Study of Indonesian Young Adults
Source: MDPI journal article supplement (doi:10.3390/nu14163326), 2022-08-14
Supplement: s1 [file s1]

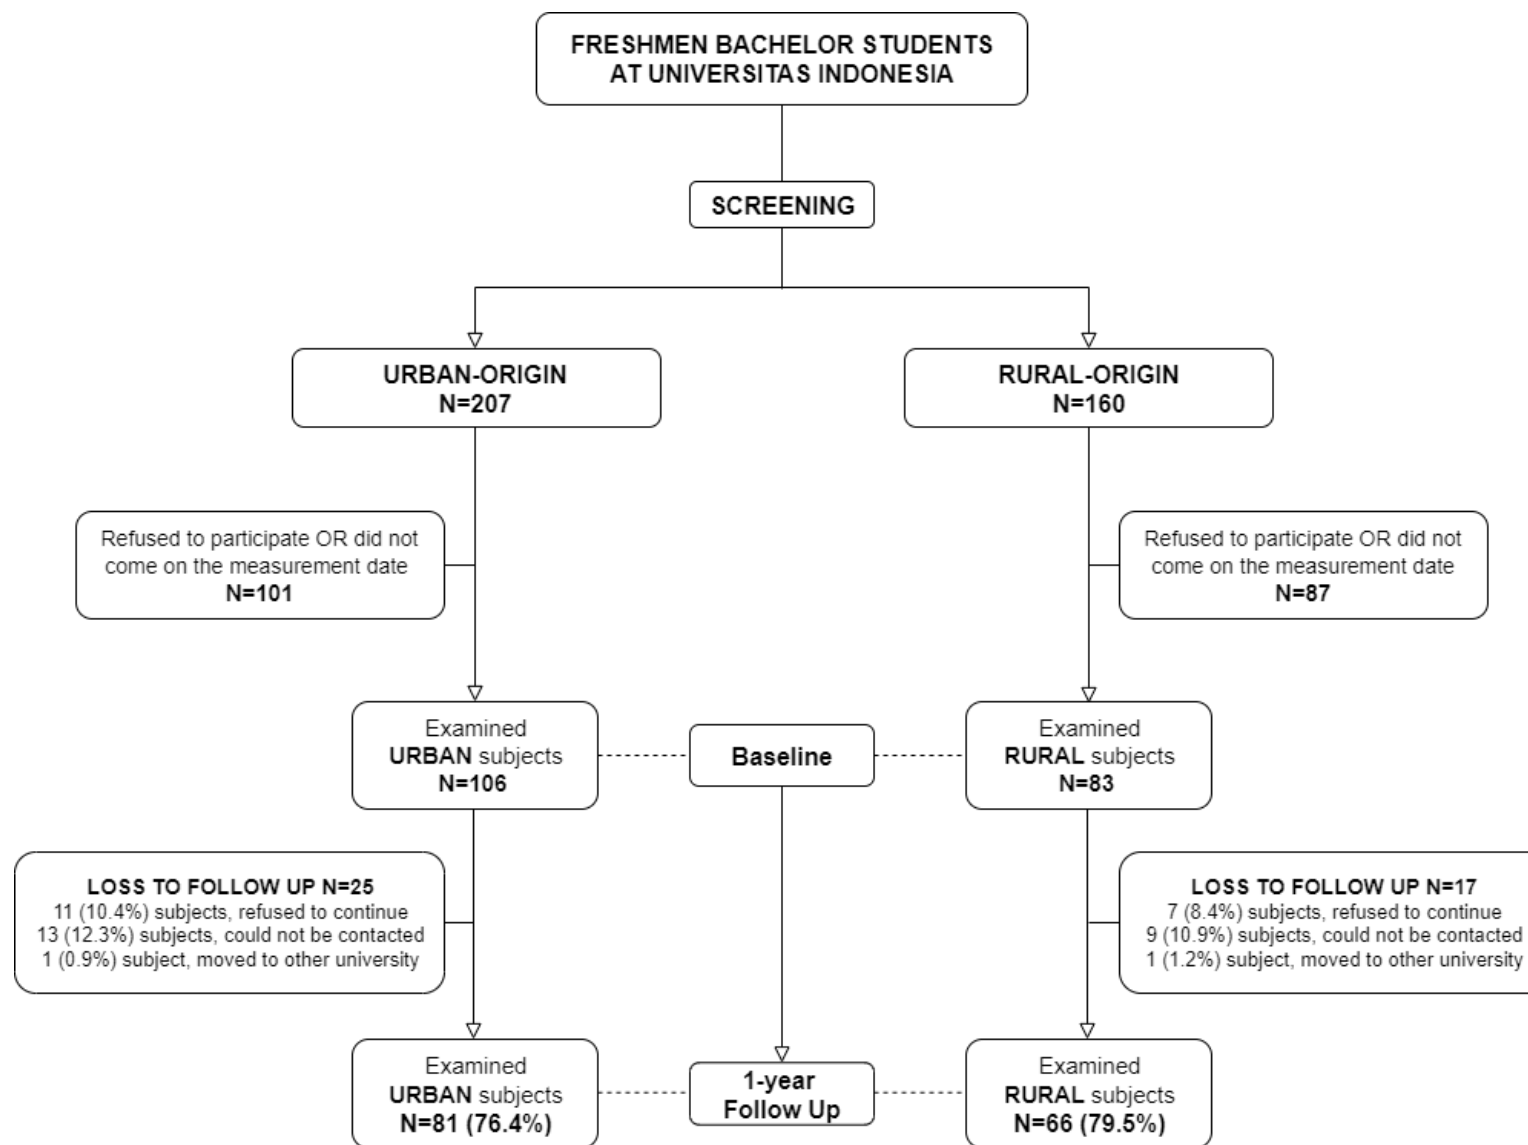

**Figure S1. Flow Chart of The Study.**

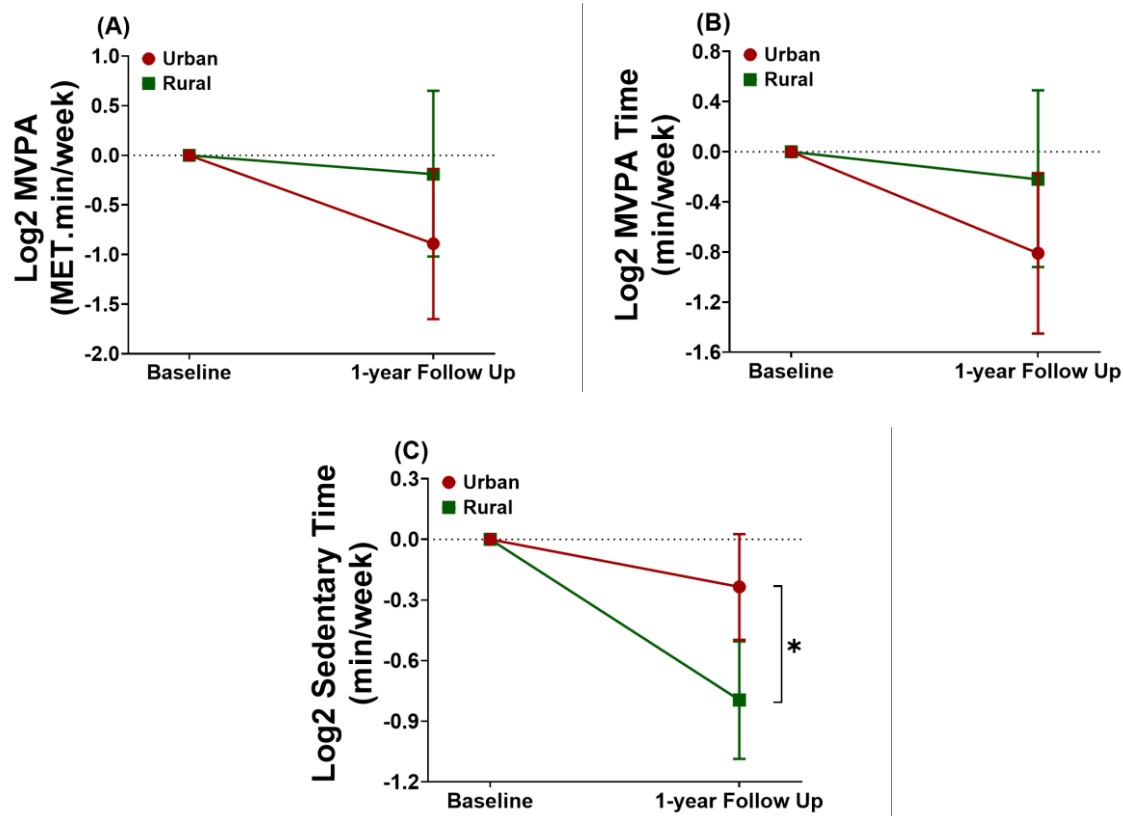

**Figure S2. The changes of physical activity levels (A & B) and sedentary time (C) in urban and rural subjects after 1-year of living in an urban environment.**

The changes are presented as estimate and its 95% confidence interval and obtained from previously log-transformed variables. The changes in each group and the differences of changes between urban and rural group for each parameter was analyzed using linear-mixed model, adjusted for age and sex. The P-value depicted in the figure represents the P-value for interaction ( $P_{int}$ ), the level of significance in the differences of changes between the two groups.

\* $P < 0.05$

MVPA: moderate-vigorous physical activity

**Table S1. Mediation analysis of the effect of dietary intake on the differences of adiposity profiles in urban and rural subjects at baseline.**

| Model†                     | Body mass index      |         |               |                         | Waist circumference  |         |               |                         | Fat percentage       |         |               |                        |
|----------------------------|----------------------|---------|---------------|-------------------------|----------------------|---------|---------------|-------------------------|----------------------|---------|---------------|------------------------|
|                            | Mean diff.           | P value | %             | Indirect                | Mean diff.           | P value | %             | Indirect                | Mean diff.           | P value | %             | Indirect               |
|                            | (95%CI)              |         | changes<br>†† | effect#<br>(95%CI)      | (95%CI)              |         | changes<br>†† | effect#<br>(95%CI)      | (95%CI)              |         | changes<br>†† | effect#<br>(95%CI)     |
| Unadjusted                 | 2.85<br>(1.60; 4.10) | <0.001  |               |                         | 6.42<br>(3.23; 9.62) | <0.001  |               |                         | 5.29<br>(2.75; 7.83) | <0.001  |               |                        |
| Adjusted for age and sex   | 2.81<br>(1.55; 4.07) | <0.001  |               |                         | 6.37<br>(3.25; 9.50) | <0.001  |               |                         | 5.07<br>(2.70; 7.44) | <0.001  |               |                        |
| (+) Total calories intake  | 2.66<br>(1.37; 3.96) | <0.001  | -5.3          | -0.20<br>(-0.62; 0.05)  | 5.99<br>(2.78; 9.21) | <0.001  | -6.0          | -0.81<br>(-2.14; -0.07) | 5.05<br>(2.60; 7.50) | <0.001  | -0.4          | 0.48<br>(-0.07; 1.19)  |
| (+) Carbohydrate intake    | 2.88<br>(1.61; 4.16) | <0.001  | +2.5          | 0.01<br>(-0.14; 0.17)   | 6.57<br>(3.40; 9.75) | <0.001  | +3.1          | -0.16<br>(-0.71; 0.18)  | 5.33<br>(2.94; 7.73) | <0.001  | +5.1          | 0.48<br>(-0.18; 1.24)  |
| (+) Fat intake             | 2.24<br>(0.97; 3.52) | 0.001   | -20.3         | -0.59<br>(-1.29; -0.15) | 4.95<br>(1.81; 8.10) | 0.002   | -22.3         | -1.70<br>(-3.45; -0.47) | 4.23<br>(1.81; 6.65) | 0.001   | -16.6         | -0.52<br>(-1.41; 0.20) |
| (+) Protein intake         | 2.32<br>(1.00; 3.63) | 0.001   | -17.4         | -0.54<br>(-1.24; -0.07) | 5.22<br>(1.96; 8.48) | 0.002   | -18.1         | -1.66<br>(-3.46; -0.43) | 4.56<br>(2.06; 7.06) | <0.001  | -10.1         | 0.11<br>(-0.81; 0.93)  |
| (+) Fat and protein intake | 2.22<br>(0.92; 3.52) | 0.001   | -21.0         | -0.64<br>(-1.38; -0.09) | 4.95<br>(1.74; 8.16) | 0.003   | -22.3         | -1.91<br>(-3.81; -0.55) | 4.38<br>(1.91; 6.85) | 0.001   | -13.6         | -0.09<br>(-1.21; 0.89) |

†All variables as an additional adjustment for age and sex.

††Proportion of changes in mean difference of the model compared to the model adjusted for age and sex only.

#Indirect effect of covariate(s) on anthropometry parameters, obtained by performing bootstrapping with 5000 iterations and presented as its 95% confidence interval.

**Table S2. The levels of physical activity and sedentary time measured with GPAQ in urban and rural subjects at baseline.**

| Variables                                                      | Urban<br>N=106      | Rural<br>N=83      | P values                 |
|----------------------------------------------------------------|---------------------|--------------------|--------------------------|
| Total volume of MVPA, MET.min/week<br>(geomean, 95% CI)        | 1868<br>(1404-2486) | 1046<br>(618-1770) | <b>0.02<sup>#</sup></b>  |
| Total time spent for MVPA, min/week<br>(geomean, 95% CI)       | 423<br>(328-546)    | 255<br>(164-397)   | <b>0.02<sup>#</sup></b>  |
| Total sedentary time, min/week<br>(geomean, 95% CI)            | 441<br>(411-472)    | 490<br>(444-540)   | <b>0.006<sup>#</sup></b> |
| Proportion of physical activity intensity categories,<br>n (%) |                     |                    |                          |
| - Low                                                          | 18 (17.0)           | 24 (29.3)          | 0.12                     |
| - Moderate                                                     | 42 (39.6)           | 25 (30.5)          |                          |
| - High                                                         | 46 (43.4)           | 33 (40.2)          |                          |

<sup>#</sup> P values derived from linear regression of log transformed data adjusted for age and sex.

The P-values shown in bold represent the statistically significant differences with P<0.05.

GPAQ: Global Physical Activity Questionnaires; MVPA: moderate-vigorous physical activity.

**Table S3. Characteristics of study population at 1-year follow-up time.**

| Variables                          | Urban<br>N=81    | Rural<br>N=66  | P values <sup>#</sup><br>(adjusted for age and sex) | P values <sup>#</sup><br>(adjusted for age, sex, and BMI) |
|------------------------------------|------------------|----------------|-----------------------------------------------------|-----------------------------------------------------------|
| Age, yrs old (mean, SD)            | 19.4 (0.6)       | 19.5 (0.7)     | 0.23                                                |                                                           |
| Sex, n male (%)                    | 31 (38.3)        | 25 (37.9)      | 0.96                                                |                                                           |
| BMI, kg/m <sup>2</sup> (mean, SD)  | 23.7 (5.2)       | 21.2 (3.3)     | <b>&lt;0.001</b>                                    |                                                           |
| BMI grouping, n (%)                |                  |                |                                                     |                                                           |
| - Underweight (<18.5)              | 8 (9.9)          | 8 (12.1)       | <b>0.02</b>                                         |                                                           |
| - Normoweight (18.5-22.9)          | 34 (42.0)        | 42 (63.6)      |                                                     |                                                           |
| - Overweight (23-24.9)             | 13 (16.0)        | 8 (12.1)       |                                                     |                                                           |
| - Obese (≥25.0)                    | 26 (32.1)        | 8 (12.1)       |                                                     |                                                           |
| Waist circumference, cm (mean, SD) | 81.6 (12.4)      | 74.5 (8.2)     | <b>&lt;0.001</b>                                    |                                                           |
| Fat percentage, % (mean, SD)       | 29.2 (9.0)       | 25.2 (8.8)     | <b>&lt;0.001</b>                                    |                                                           |
| FBG, mg/dL (mean, SD)              | 91.1 (6.7)       | 90.4 (5.9)     | 0.56                                                |                                                           |
| HbA1c, % (mean, SD)                | NA               | NA             |                                                     |                                                           |
| Fasting insulin†, IU/mL            | 5.2 (4.0-7.0)    | 2.8 (2.0-3.9)  | <b>0.006</b>                                        | 0.06                                                      |
| HOMA-IR†                           | 1.2 (0.9-1.6)    | 0.6 (0.5-0.9)  | <b>0.006</b>                                        | 0.07                                                      |
| Leptin†, ng/mL                     | 13.7 (11.3-16.8) | 9.7 (7.4-12.7) | <b>0.01</b>                                         | 0.74                                                      |
| Adiponectin†, µg/mL                | 4.0 (3.6-4.4)    | 4.4 (3.9-4.9)  | 0.28                                                | 0.95                                                      |
| Leptin-Adiponectin (L/A) Ratio†    | 3.5 (2.8-4.3)    | 2.2 (1.7-3.0)  | <b>0.01</b>                                         | 0.75                                                      |
| Dietary intake, mean (SD)          |                  |                |                                                     |                                                           |
| - Total calories, kcal             | 1659 (409)       | 1510 (422)     | <b>0.04</b>                                         | 0.19                                                      |
| - Fat, gram                        | 69 (25)          | 60 (21)        | <b>0.03</b>                                         | 0.17                                                      |
| - Protein, gram                    | 58 (16)          | 55 (17)        | 0.35                                                | 0.85                                                      |
| - Carbohydrate, gram               | 197 (49)         | 187 (60)       | 0.24                                                | 0.42                                                      |

†Not normally distributed continuous variables, presented as geomean (95% CI) and log transformed for analysis.

#Analyzed with linear regression for continuous variables and Chi-square test for categorical variables.

The P-values shown in bold represent the statistically significant differences with P<0.05.

BMI: body mass index; FBG: fasting blood glucose; HOMA-IR: homeostatic model assessment for insulin resistance

**Table S4. The effect of the differences in protein intake changes on the differences of BMI increase after 1-year between urban and rural subjects.**

| Model                                                              | $\Delta\text{BMI}^{\dagger\dagger}$ |          |                            |
|--------------------------------------------------------------------|-------------------------------------|----------|----------------------------|
|                                                                    | Estimated differences#<br>(95%CI)   | P values | Indirect effect<br>(95%CI) |
| Adjusted for age and sex                                           | 0.53 (0.22; 0.84)                   | <0.001   |                            |
| Adjusted for age, sex, and $\Delta\text{protein intake}^{\dagger}$ | 0.55 (0.24; 0.86)                   | <0.001   | -0.02 (-0.10; 0.02)        |

$^{\dagger}\Delta\text{protein intake}$  = the differences of protein intake at 1-year follow-up time point with protein intake at baseline.

$^{\dagger\dagger}\Delta\text{BMI}$  = the differences of body mass index at 1-year follow-up time point with body mass index at baseline.

#Estimated differences of  $\Delta\text{BMI}$  between urban and rural subjects, analyzed using linear-mixed model.
